1 **Title:**

2 RAPID PLIOCENE DIVERSIFICATION OF MODERN KANGAROOS

3

4 **Summary:**

5 Analysis of dental trait evolution shows that kangaroos rapidly diversified in response to  
6 Pliocene environmental change rather than Miocene aridification.

7

8 **Authors:**

9 Aidan M. C. Couzens<sup>1,2\*</sup>, and Gavin J. Prideaux<sup>1</sup>

10

11 **Affiliations:**

12 <sup>1</sup>College of Science and Engineering, Flinders University, Bedford Park, South Australia  
13 5042, Australia

14 <sup>2</sup>Naturalis Biodiversity Center, Postbus 9517, 2300, RA, Leiden, The Netherlands

15 \*Corresponding author (aidan.couzens@naturalis.nl).

16

17 **Key Words:**

18 Teeth, marsupial, adaptation, diversification, diet.

19

20 **Abstract:**

21 Differentiating between ancient and rapidly-evolved clades is critical for understanding  
22 impacts of environmental change on biodiversity. Australia possesses many aridity-adapted  
23 lineages, the origins of which have been linked by molecular evidence to late Miocene  
24 drying. Using dental macrowear and molar crown-height measurements spanning the past 25  
25 million years, we show that the most iconic of Australia's terrestrial mammals, 'true'

26 kangaroos and wallabies (Macropodini), diversified in response to Pliocene grassland  
27 emergence. In contrast, low-crowned short-faced kangaroos radiated into browsing niches as  
28 the late Cenozoic became more arid, contradicting the view that this was a period of global  
29 decline among browsers. Our results link warm intervals with bursts of diversification and  
30 undermine arguments attributing Pleistocene megafaunal extinction to aridity-forced dietary  
31 change.

32

### 33 **Main Text:**

34 Adaptive radiation within novel ecological contexts is believed to underpin the diversification  
35 of many animal groups (1). However, the rapid divergence of lineages (2) can make it  
36 challenging to accurately date their origins from molecular or morphological data (3). Often  
37 the result is a dichotomy between so-called short- and long-fuse diversification models,  
38 which can imply starkly different scenarios for how environmental change shapes biological  
39 diversity (4).

40

41 During the last 15 million years (Myr), Australia has undergone a large-scale environmental  
42 shift from a mesic to largely arid continent (5). This environmental shift has been closely  
43 linked with the evolution of a diverse, aridity-adapted biota (6), which includes such iconic  
44 members as the kangaroos and wallabies (Macropodidae), the most diverse marsupial  
45 herbivores ever to evolve. But, the timing and drivers of macropodid evolution have been  
46 difficult to resolve due to a patchy fossil record and imprecise divergence dating (7). Most  
47 phylogenetic analyses find that the Macropodini, the clade composed of species with grass-  
48 based diets (>70% of extant macropodoid diversity) was well underway during the arid late  
49 Miocene (c. 12–7 Myr ago) (7-9), 3–8 Myr before Australian grasslands emerged (5).

50

51 On the northern continents late Neogene grassland expansion ushered in the diversification of  
52 herbivores with high-crowned molar teeth, most notably ungulates (10, 11). Their success has  
53 been linked to the improved resistance of their dentitions to the elevated rates of dental wear  
54 characteristic of grazing diets (12). Similarly, macropodid grass consumers have higher-  
55 crowned molars than their browsing and fungivorous counterparts (13). The origin of high-  
56 crowned dentitions near the base of Macropodini (7) suggests that increased grass  
57 exploitation may have been a key factor in macropodid success. However, molar crown-  
58 height data has never been used to infer precisely when kangaroos became grazers or how  
59 this event was linked to environmental change.

60

61 To examine the role of dietary change in kangaroo adaptive radiation we measured molar  
62 macrowear levels (figs. S1,2) and crown height for >3,000 macropodoid specimens from the  
63 modern fauna and c. 100 fossil assemblages of late Oligocene to Holocene age (14). This  
64 enabled us to track diet and trait evolution in parallel. Our analysis reveals that macropodid  
65 kangaroos underwent a rapid burst of morphological diversification as grassland biomes took  
66 hold across Pliocene Australia.

67

68 Ancestral-state reconstruction shows that the low-crowned dentitions of balbarines and stem  
69 macropodids were ancestral for Macropodoidea (figs. 1A, 2A). Both groups have low crown  
70 heights (fig. 1A) and limited macrowear disparity (fig. 1B) suggesting either dietary overlap  
71 or that other aspects of dental morphology (e.g. curvature, complexity) or digestive  
72 physiology were more critical to dietary partitioning early in kangaroo evolution. Late  
73 Oligocene through middle Miocene dental macrowear and crown-height values amongst  
74 balbarine and stem macropodids (figs. 1C, D) generally suggest reliance upon low-abrasion  
75 foods. However, some middle Miocene samples from northwestern Queensland show that

76 balbarines had more abrasive diets near the middle Miocene climatic optimum (fig. 1C)  
77 which seems to capture an unsuccessful attempt by balbarine kangaroos to capitalize on more  
78 abrasive plant resources before their late Miocene extinction (15).  
79  
80 Comparative modelling reveals a middle Miocene split in adaptive strategies (fig. 2A), with  
81 derived macropodids departing on a trajectory toward specialization as folivores, whereas  
82 hypsiprymnodontids and potoroines remained generalists or truffle consumers (fig. 2A).  
83 Shifting between generalist and more specialized diets has been argued to require traversing  
84 of adaptive ‘valleys’ between fitness ‘peaks’ (16) and we hypothesize that transitional  
85 macropodid lineages exhibited faster taxonomic turnover, lower abundance and smaller  
86 geographic ranges than taxa closer to these trophic optima (e.g. 10, 17).  
87  
88 Unexpectedly, we find no evidence for increased late Miocene macrowear or crown-height  
89 analogous to those interpreted as responses to aridity in Northern Hemisphere herbivores (10,  
90 11, 18). Instead, late Miocene macropodids, represented by early members of the two most  
91 diverse kangaroo clades (Sthenurinae, Macropodinae), express even lower crown-height and  
92 macrowear levels than earlier macropodoids (figs. 1A, B). This is especially surprising given  
93 that central Australian faunal assemblages (e.g., Alcoota) should have been amongst the first  
94 to see grassland establishment (19). The low macrowear levels and low-crowned bilophodont  
95 molars typical of late Miocene macropodids, together with the basal phylogenetic position of  
96 modern browsing macropodids (e.g., *Dendrolagus*, *Dorcopsis*, *Setonix*) (7-9), indicate that  
97 browsing was ancestral for the subsequent sthenurine and macropodine radiations.  
98  
99 Marked crown-height and macrowear increases across the Miocene–Pliocene transition (fig.  
100 1) herald a major adaptive shift in kangaroo evolution. Molar crown-height increased by up

101 to 40% in as little as 3 Myr (fig. 1A), which is comparable to the fastest rates measured  
102 amongst Neogene ungulates (10). Large parameter estimates for selection pressure from the  
103 best-fitting phylogenetic comparative model (table S7) and the correlated increase of crown-  
104 height and macrowear suggest that accelerated dental evolution was driven by selection for  
105 improved dental durability. Although early Pliocene macrowear levels are somewhat higher  
106 than late Miocene levels (fig. 1B), they are markedly lower than mid- and late Pliocene  
107 levels, suggesting that the rapid spread of late Pliocene grasslands intensified selective  
108 pressure for morphological diversification. Increasing molar crown-height was likely  
109 adaptive because it delayed loph collapse, the point at which bilophodont molars are  
110 relegated to a crushing rather than cutting modality (20). Supporting this, macrowear from  
111 the mid-Pliocene onwards is characterized by unprecedented loph destruction (fig. 1B).

112

113 Average macrowear and crown-height levels are similar between Pliocene macropodins and  
114 non-macropodins (fig. 3A); only during the late Pliocene do macropodins show evidence of  
115 high-wear diets (fig. 3B). Based on the diet–crown-height relationship amongst extant  
116 kangaroos (fig. 2B), the highest-crowned mid to late Pliocene macropodins (Chinchilla, Bluff  
117 Downs) evidently consumed both grass and dicot leaves. This generalist diet fits with enamel  
118  $\delta^{13}\text{C}$  values for species of *Macropus* and *Protemnodon* from Chinchilla (21). It suggests that  
119 the Pliocene was a period of trophic generalism amongst macropodines, with dietary  
120 specialization emerging surprisingly late, perhaps not until the early Pleistocene. This late  
121 arrival of specialized diets helps explain why most extant macropodines are mixed-feeders  
122 (22) and the rapid rates of dental evolution associated with generalist diets suggests less-  
123 commonly-consumed, fallback foods can be potent drivers of dietary adaptation (23).

124

125 The evidence for rapid macropodid dental evolution has important implications for the timing  
126 and context of kangaroo diversification. Most recent phylogenetic analyses support a short-  
127 fuse model (fig. 4A), where macropodid generic and many intrageneric splits are placed  
128 within the drying late Miocene (7, 8). However, this fits uncomfortably with our evidence for  
129 a Pliocene adaptive shift, as well as the absence of any known Miocene macropodids. Our  
130 data instead support the existence of two Pliocene events: 1) macropodid genera (fig. 4B)  
131 emerge during the early Pliocene ‘warm reversal’ (24); and 2) adaptively radiate during the  
132 arid late Pliocene and early Pleistocene as grassland expansion enables dietary partitioning.  
133 This scenario implies accelerated molecular rates at the base of Macropodini. Under this  
134 model the occurrence of *Macropus* at 4.46 Myr (Hamilton) necessitates around four genus-  
135 level splits (*Macropus*, *Setonix*, *Lagorchestes*, *Onychogalea*) within less than 0.9 Myr. While  
136 rapid, this is still slower than speciation rates implied for some placental radiations (4). Or  
137 inference is supported by recent, whole-genome phylogenetic analyses that suggest rapid,  
138 even reticulated evolution within *Macropus* (25).

139

140 The limited Australian late Miocene fossil record means a hitherto-concealed Miocene  
141 macropodid radiation cannot be ruled out, but several lines of evidence favor a more rapid  
142 Pliocene diversification model. First, despite >50 years of collecting, the late Miocene  
143 Alcoota assemblage of central Australia has yielded no macropodids, but many specimens of  
144 the low-crowned dorcopsin *Dorcopsoides fossilis*, sthenurine *Hadronomas puckridgi*, and  
145 three as-yet-undescribed, low-crowned, non-macropodid kangaroos. Second, an extremely  
146 rapid basal divergence of macropodids would help explain the persistent difficulty in  
147 phylogenetically placing putative basal macropodids like *Setonix* and *Onychogalea* as well as  
148 evidence for substantial introgression at the base of Macropodini (25). Third, given  
149 grasslands were uncommon until the late Pliocene (5), an ‘explosive’ model would imply a

150 much simpler scenario of dietary adaptation, with perhaps just a single acquisition of grazing,  
151 rather than as many as nine required by a short-fuse scenario (fig. S5). Finally, short-fuse  
152 trees invoke the existence of high-crowned macropodines 4–7 Myr before Pliocene  
153 grasslands and well outside the range of fossil crown-heights (fig. 4C). Only by restricting the  
154 macropodin and dendrolagin radiations to the Pliocene do we recover the pronounced  
155 Pliocene increase in crown-heights captured by the fossil record (fig. 4C). This raises the  
156 prospect that rock-wallabies and tree-kangaroos also did not originate until the early  
157 Pliocene.

158

159 The late Neogene has been interpreted as a phase of waning diversity amongst low-crowned  
160 browser groups (18), but we find that the Pleistocene diversification of sthenurine kangaroos  
161 (26) occurred almost entirely within a low-crowned region of morphospace (fig. 1C).  
162 Sthenurine diversity more than doubles across the Pliocene–Pleistocene boundary (26) during  
163 a period when Australian terrestrial primary productivity was declining (5, 24). Sthenurine  
164 diversification thus contradicts expectations that intervals of high browser diversity are  
165 coupled to high primary productivity (18). In line with this peak in sthenurine species  
166 richness (26), the macrowear data reveal that sthenurine diets were diversifying (fig. 3C). The  
167 reliance of some sthenurines like *Procoptodon goliath* on chenopod shrubs, a dicot plant  
168 adapted to low-rainfall and high salinity (27), raises the prospect that expanded chenopod  
169 biomass around the middle Pleistocene arid shift (0.7 Myr) (28) could have been a key factor  
170 in this diversification. Evidence that sthenurine diversification was, if anything, gathering  
171 pace during the middle to late Pleistocene, and was closely coupled to dietary change through  
172 an interval of deepening aridity, discounts the possibility that such factors drove sthenurine  
173 extinction (29).

174

175 Aridity has been widely implicated in the diversification of modern clades (6, 9) but our data  
176 reveal a more dynamic picture where warm to cool oscillations promote taxonomic, and later  
177 ecological and morphological diversification. Warm–wet intervals are associated with  
178 diversification amongst other mammalian groups (18, 30), but a generalizable model of how  
179 these climatic perturbations are linked to diversification has yet to emerge. We propose that  
180 warm–wet conditions may ‘prime’ clades for rapid morphological and ecological  
181 diversification during ensuing arid intervals, perhaps by fostering trophic generalists that can  
182 later undergo bursts of speciation when ecological opportunity arrives (16). Future tests of  
183 this model which leverage the Cenozoic record of oscillating climate hold promise for  
184 revealing how climatically-driven ecological change drives adaptive diversification.

185

## 186 **References and Notes**

- 187 1. D. Schluter, *The Ecology of Adaptive Radiation* (OUP Oxford, 2000).
- 188 2. P. W. Messer, S. P. Ellner, N. G. Hairston, Can population genetics adapt to rapid  
189 evolution? *Trends Genet.* **32**, 408–418 (2016).
- 190 3. R. M. D. Beck, M. S. Y. Lee, Ancient dates or accelerated rates? Morphological clocks  
191 and the antiquity of placental mammals. *Proc R Soc Lond B Biol Sci* **281**, 20141278  
192 (2014).
- 193 4. M. A. O’leary et al., The placental mammal ancestor and the post-K–Pg radiation of  
194 placentals. *Science* **339**, 662–667 (2013).
- 195 5. H. A. Martin, Cenozoic climatic change and the development of the arid vegetation in  
196 Australia. *J Arid Environ* **66**, 533–563 (2006).



- 197 6. M. Byrne et al., Birth of a biome: insights into the assembly and maintenance of the  
198 Australian arid zone biota. *Mol Ecol* **17**, 4398–4417 (2008).
- 199 7. G. J. Prideaux, N. M. Warburton, An osteology-based appraisal of the phylogeny and  
200 evolution of kangaroos and wallabies (Macropodidae: Marsupialia). *Zoo J Linn Soc*  
201 **159**, 954–987 (2010).
- 202 8. R. W. Meredith, M. Westerman, M. S. Springer, A phylogeny and timescale for the  
203 living genera of kangaroos and kin (Macropodiformes: Marsupialia) based on nuclear  
204 DNA sequences. *Aust J Zool* **56**, 395–410 (2009).
- 205 9. K. J. Mitchell et al., Molecular phylogeny, biogeography, and habitat preference  
206 evolution of marsupials. *Mol Biol Evol* **31**, 2322–2330 (2014).
- 207 10. J. Jernvall, M. Fortelius, Common mammals drive the evolutionary increase of  
208 hypsodonty in the Neogene. *Nature* **417**, 538 (2002).
- 209 11. J. L. Cantalapiedra, J. L. Prado, M. Hernández Fernández, M. T. Alberdi, Decoupled  
210 ecomorphological evolution and diversification in Neogene-Quaternary horses. *Science*  
211 **355**, 627–630 (2017).
- 212 12. C. M. Janis, M. Fortelius, On the means whereby mammals achieve increased  
213 functional durability of their dentitions, with special reference to limiting factors. *Biol*  
214 *Rev Camb Philos Soc* **63**, 197–230 (1988).
- 215 13. C. Janis, Why kangaroos (Marsupialia: Macropodidae) are not as hypsodont as  
216 ungulates (Eutheria). *Aust Mammal* **13**, 49–53 (1990).
- 217 14. Materials and methods are available as supplementary materials at the Science website.

- 218 15. K. Butler, K. J. Travouillon, G. J. Price, M. Archer, S. J. Hand, Species abundance,  
219 richness and body size evolution of kangaroos (Marsupialia: Macropodiformes)  
220 throughout the Oligo-Miocene of Australia. *Palaeogeogr Palaeoclimatol Palaeoecol*  
221 **487**, 25–36 (2017).
- 222 16. C. H. Martin, P. C. Wainwright, Multiple fitness peaks on the adaptive landscape drive  
223 adaptive radiation in the wild. *Science* **339**, 208–211 (2013).
- 224 17. P. Raia, F. Passaro, D. Fulgione, F. Carotenuto, Habitat tracking, stasis and survival in  
225 Neogene large mammals. *Biol Lett* **8**, 64–66 (2012).
- 226 18. C. M. Janis, J. Damuth, J. M. Theodor, Miocene ungulates and terrestrial primary  
227 productivity: Where have all the browsers gone? *Proc Natl Acad Sci USA* **97**, 7899–  
228 7904 (2000).
- 229 19. N. Herold, M. Huber, D. Greenwood, R. Müller, M. Seton, Early to middle Miocene  
230 monsoon climate in Australia. *Geology* **39**, 3–6 (2011).
- 231 20. W. v. Koeniqswald, Mastication and wear in Lophiodon (Perissodactyla, Mammalia)  
232 compared with lophodont dentitions in some other mammals. *Ann Zool Fennici* **51**,  
233 162–176 (2014).
- 234 21. S. Montanari, J. Louys, G. J. Price, Pliocene paleoenvironments of southeastern  
235 Queensland, Australia inferred from stable isotopes of marsupial tooth enamel. *PLOS*  
236 *ONE* **8**, e66221 (2013).
- 237 22. S. D. Arman, G. J. Prideaux, Dietary classification of extant kangaroos and their  
238 relatives (Marsupialia: Macropodoidea). *Austral Ecol* **40**, 909–922 (2015).

- 239 23. P. S. Ungar, "Tooth form and function: insights into adaptation through the analysis of  
240 dental microwear" in *Comparative Dental Morphology*, T. Koppe, G. Meyer, K. W.  
241 Alt, Eds. (Basel, Karger, 2009), pp. 38–43.
- 242 24. J. M. K. Sniderman et al., Pliocene reversal of late Neogene aridification. *Proc. Natl*  
243 *Acad Sci USA* **113**, 1999–2004 (2016).
- 244 25. M. A. Nilsson, Y. Zheng, V. Kumar, M. J. Phillips, A. Janke, Speciation generates  
245 mosaic genomes in kangaroos. *Genome Biol Evol* **10**, 33–44 (2017).
- 246 26. G. Prideaux, *Systematics and Evolution of the Sthenurine Kangaroos* (Univ of  
247 California Press, 2004), vol. 146.
- 248 27. G. J. Prideaux et al., Extinction implications of a chenopod browse diet for a giant  
249 Pleistocene kangaroo. *Proc Natl Acad Sci USA* **106**, 11646–11650 (2009).
- 250 28. B. Pillans, R. Bourman, Mid Pleistocene arid shift in southern Australia, dated by  
251 magnetostratigraphy. *Soil Res* **39**, 89–98 (2001).
- 252 29. L. R. G. DeSantis, J. H. Field, S. Wroe, J. R. Dodson, Dietary responses of Sahul  
253 (Pleistocene Australia–New Guinea) megafauna to climate and environmental change.  
254 *Paleobiology* **43**, 181–195 (2017).
- 255 30. C. V. Bennett, P. Upchurch, F. J. Goin, A. Goswami, Deep time diversity of  
256 metatherian mammals: implications for evolutionary history and fossil-record quality.  
257 *Paleobiology*, 10.5061/dryad.bt651 (2018).
- 258 31. J. Zachos, M. Pagani, L. Sloan, E. Thomas, K. Billups, Trends, rhythms, and  
259 aberrations in global climate 65 Ma to Present. *Science* **292**, 686–693 (2001).

260 32. D. Megirian, G. J. Prideaux, P. F. Murray, N. Smit, An Australian land mammal age  
261 biochronological scheme. *Paleobiology* **36**, 658–671 (2010).

262

## 263 **Acknowledgements**

264

265 We thank the hundreds of volunteers, students and scientists who collected and prepared  
266 specimens used in this analysis. For specimen loans and access we thank Y.-Y. Zhen and S.  
267 Ingelby (Australian Museum), K. Spring and H. Janetski (Queensland Museum), A. Camens  
268 and L. Nink (Flinders University), D. Pickering and T. Ziegler (Museum Victoria), R. Palmer  
269 (Australian National Wildlife Collection), M.-A. Binnie and D. Stemmer (South Australian  
270 Museum), M. Siverson, H. Ryan, and L. Umbrello, (Western Australian Museum), A. Yates  
271 (Museum and Art Gallery of the Northern Territory) and P. Holroyd (University of California  
272 Museum of Paleontology). L. Hlusko and D. Polly are thanked for comments on an earlier  
273 version of this paper. R. Meredith kindly provided a copy of his divergence time tree. M.  
274 Rücklin generously supported completion of this paper while A. Couzens was a Naturalis  
275 postdoctoral fellow. **Funding:** this research was supported by two Australian Research  
276 Council grants to GJP (DP110100726, FT130101728). AMCC was supported by an  
277 Australian Postgraduate Award. **Competing interests:** the authors declare no competing  
278 interests. **Data materials and availability:** all data, code, and materials used in the analysis  
279 are available on dryad.

280

## 281 **Supplementary Materials**

282 Materials and Methods

283 Supplementary Text

284 Table S1–S7

285 Fig. S1–S5

286 References (33–71)

287

## 288 **Figure Legends**

289

290 **Fig. 1.** (A) Macropodoid molar crown-height ( $M_{2 \& 3}$ ) and (B) dental macrowear ( $M_{2, 3}$ )

291 aligned with the global benthic foraminiferal oxygen isotopic curve ( $\delta^{18}\text{O}$ , black) (31).

292 Median (C) macropodoid crown-height ( $M_{2 \& 3}$ ) and (D) geometric mean macrowear ( $M_{2, 3}$ )

293 for macropodoid clades binned within geological sub-epochs. Land mammal ages follow

294 (32). Abbreviations: Nar; Naracoortean, Tir; Tirarian, Pl; Pliocene, Hol; Holocene.

295

296 **Fig. 2.** Phylogenetic reconstruction of crown-height in fossil and living macropodoids and

297 relationship between diet and crown-height in living macropodoids. (A). Phylogenetic

298 reconstruction of molar crown-height evolution in crown-group Macropodoidea reveals an

299 early Miocene diet shift from fungi to browse and an early Pliocene switch from browse to

300 grass. (B) Extant grass-consuming macropodoids have significantly greater crown-heights

301 than non-grass-consuming species. Diet abbreviations: ‘F’, Fungivore; ‘B’, Browser; ‘MF’,

302 Mixed-feeder; ‘G’, Grazer.

303

304 **Fig. 3.** Dental macrowear evolution in macropodine and sthenurine kangaroos during the late

305 Neogene. (A). Both Pliocene macropodins and non-macropodins show trends towards

306 increasing molar crown–height; the extant pattern of high-crowned macropodins and lower-

307 crowned macropodins emerged in the Pleistocene. (B). Early and middle Pliocene

308 macropodin and non-macropodin kangaroos both consumed abrasive foods but late Pliocene

309 dental innovations like high-crowned teeth enabled macropodins to specialize on grasses.  
310 (C). Sthenurine and macropodine kangaroos differentiated into low and high abrasion diets  
311 respectively during the early Pliocene with sthenurines diversifying diets again during the  
312 middle and late Pleistocene.

313

314 **Fig. 4.** Alternative models of kangaroo diversification and climatic oscillations. (A). The  
315 ‘short-fuse’ model links macropodin adaptive radiation with late Miocene aridification. (B).  
316 An ‘explosive’ model implies diversification during the Early Pliocene warm-wet interval.  
317 Divergence times and error bars for the short-fuse model follow (8). Global stable oxygen  
318 isotopic record from (31) and Nullarbor Region (south-central Australia) mean annual  
319 precipitation from (24). (C). Restricting macropodin and dendrolagin diversification to the  
320 Early Pliocene is the only model which reproduces increased Pliocene crown-height.

321

322 **Figures**

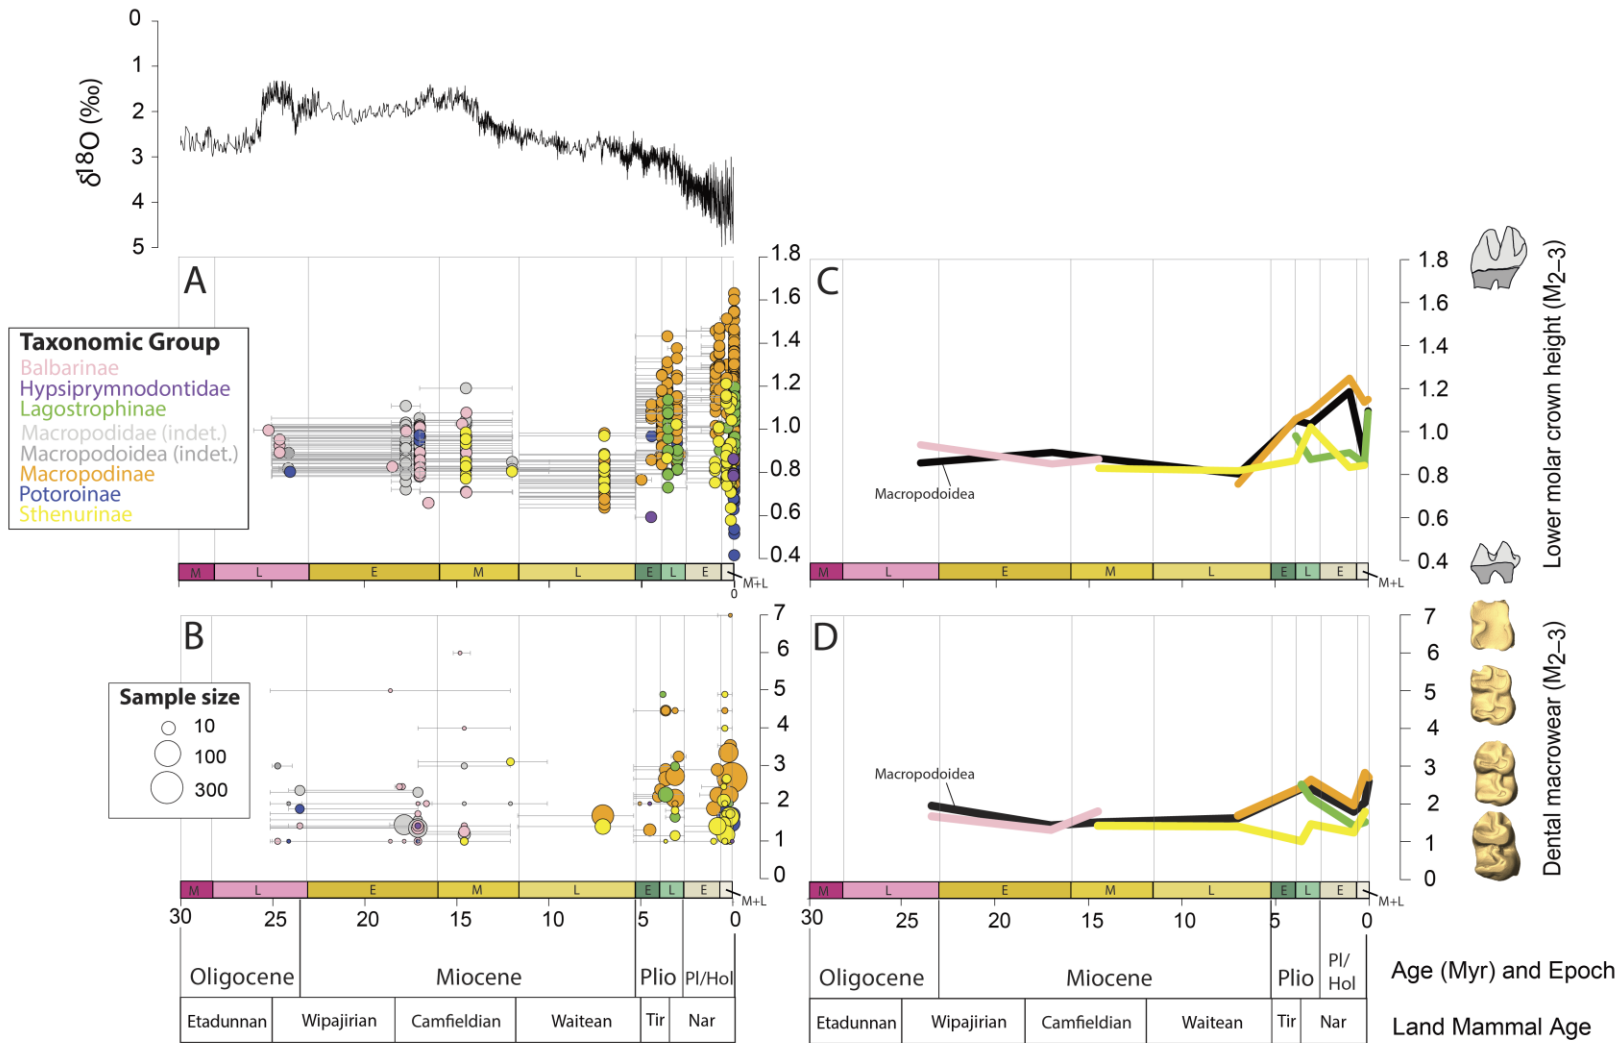

323

324 **Figure 1.**

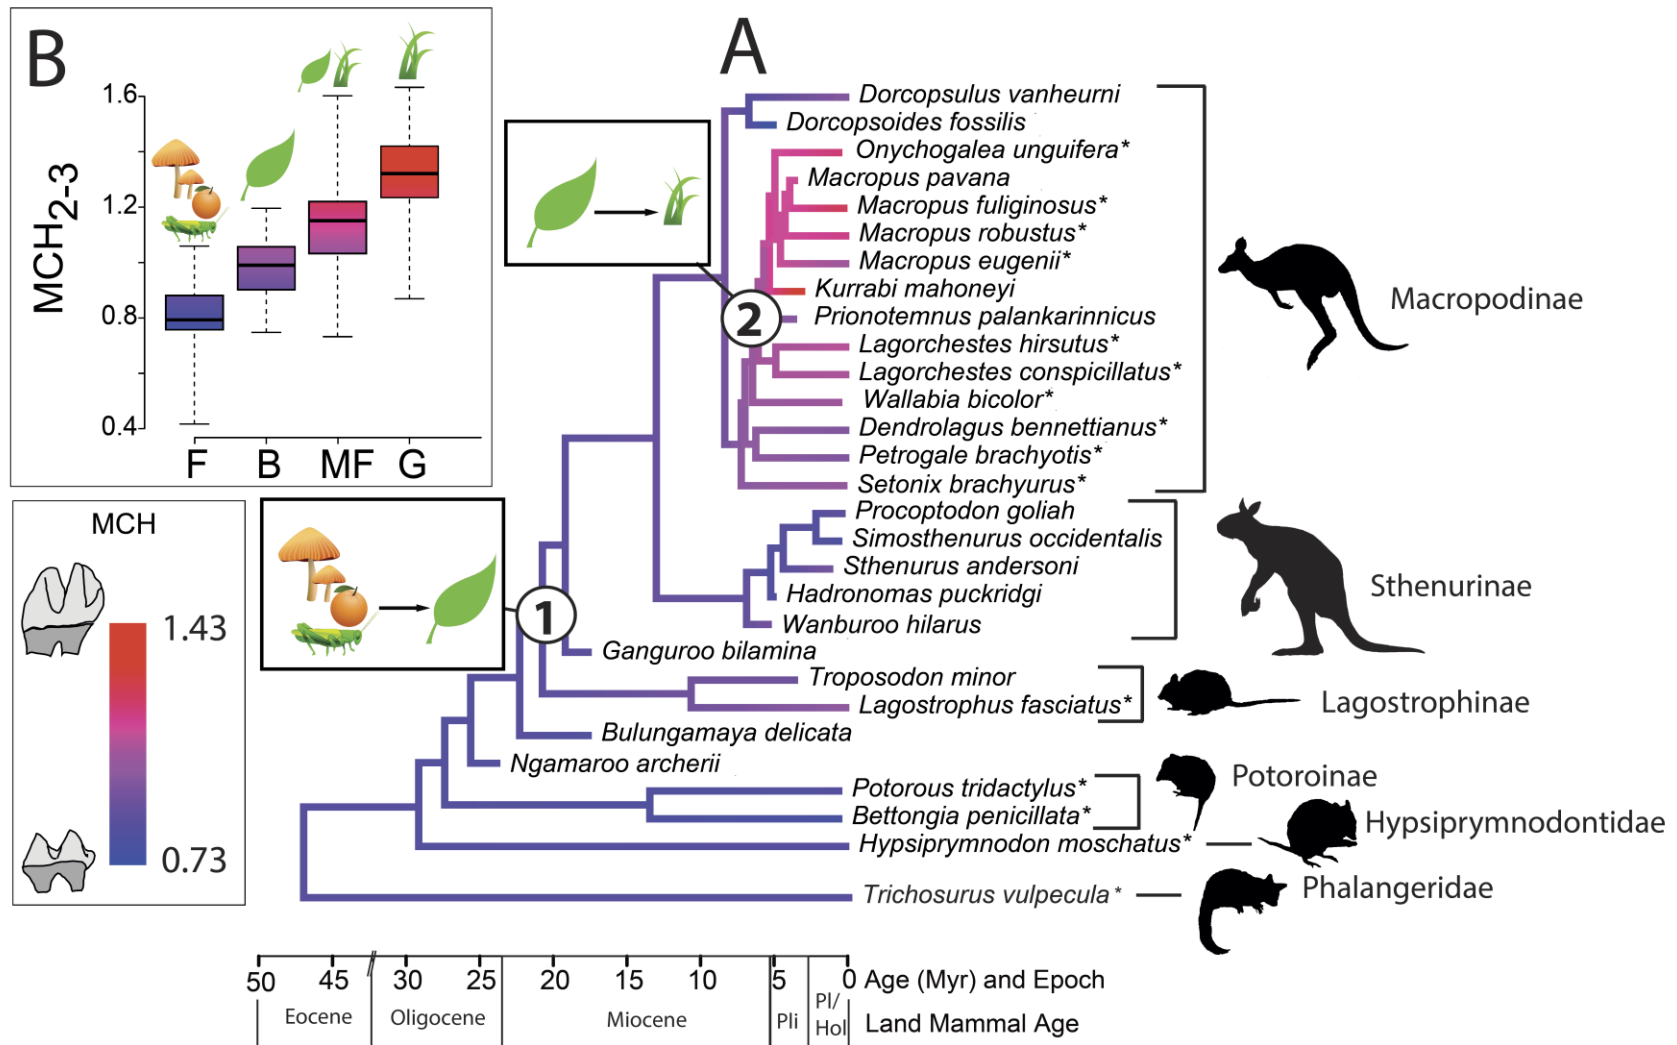

325

326 **Figure 2.**



327

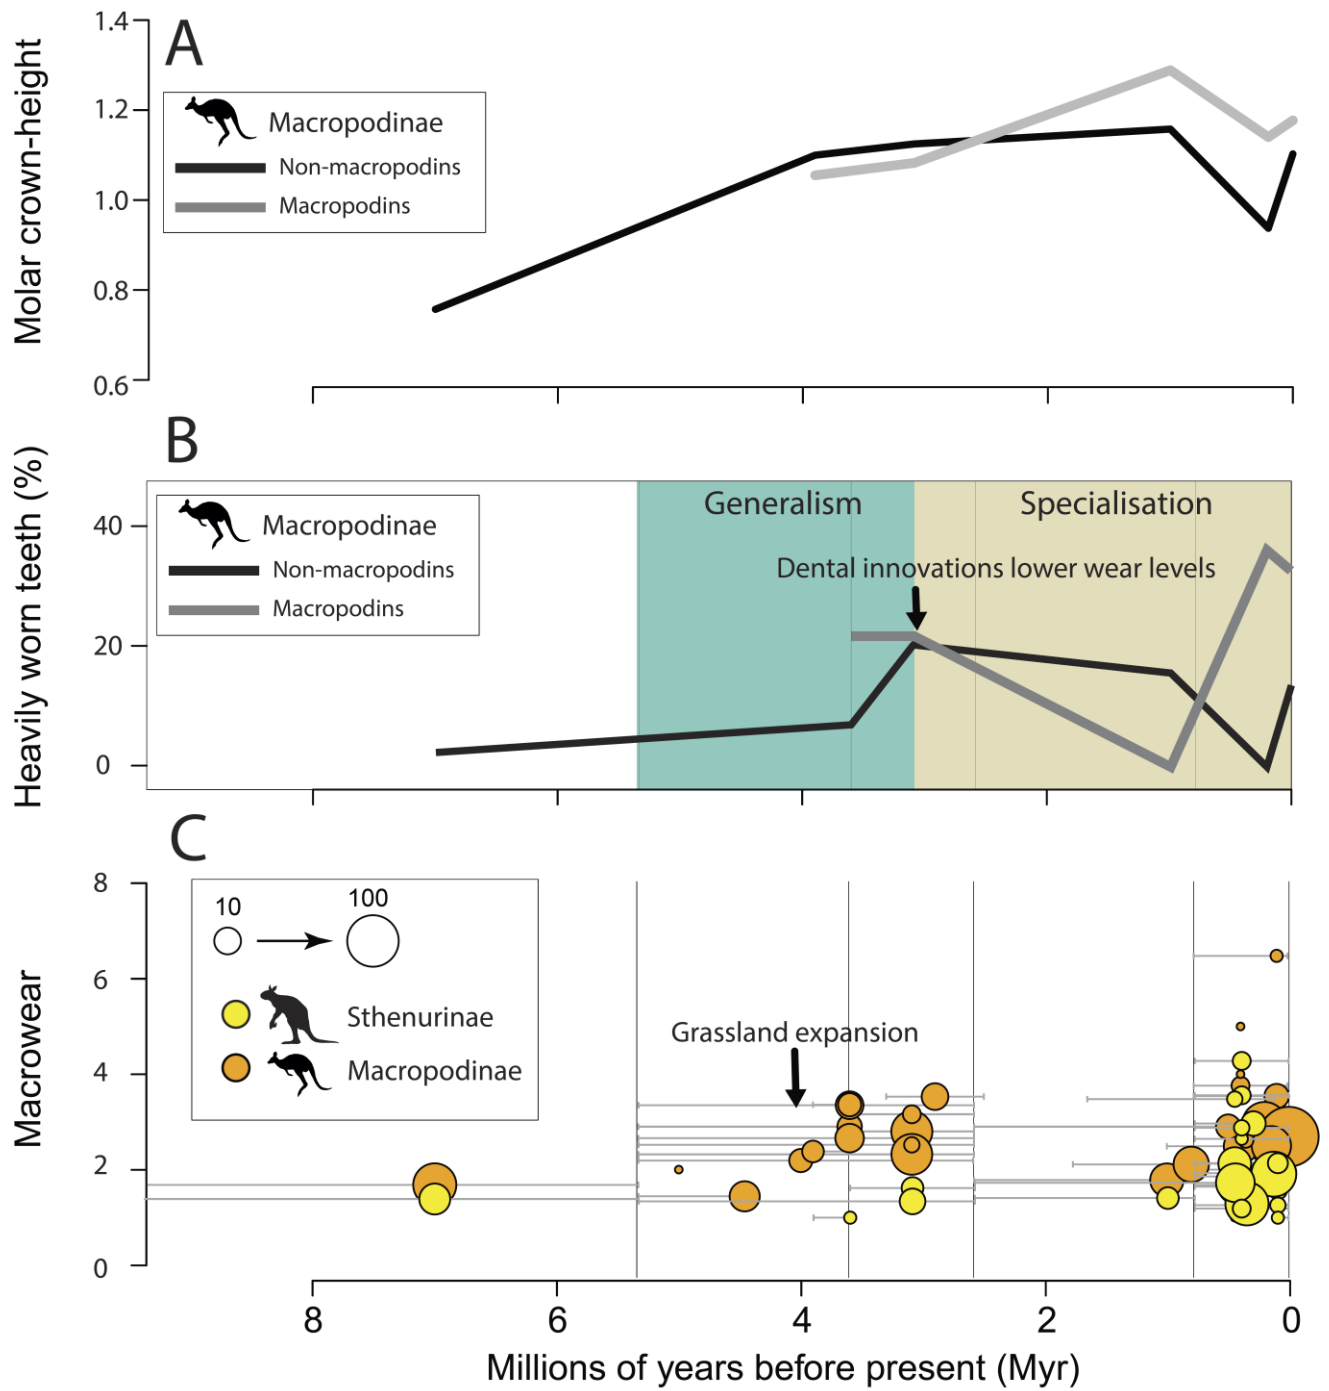

328

329 **Figure 3.**

330

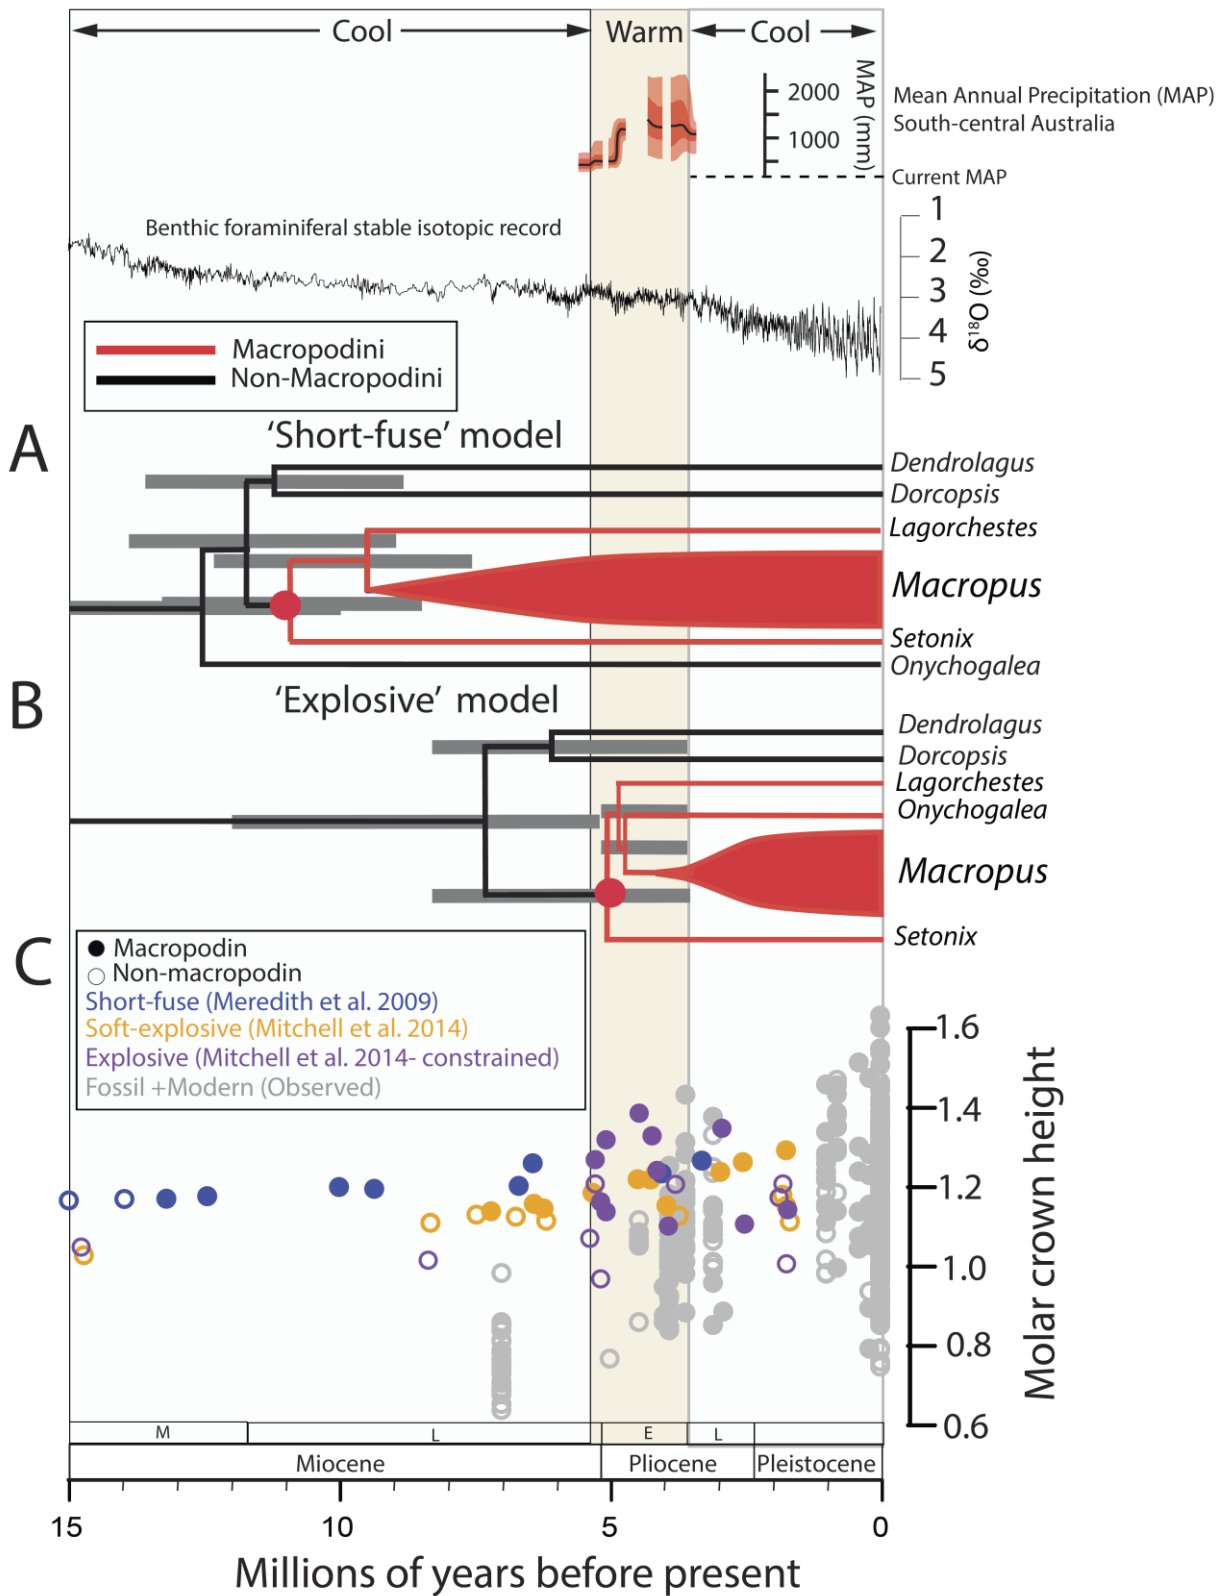

331

332 **Figure 4.**
